# Supplementary material
Source: PubMed Central journal article supplement (PMC6551220)

## Supplementary Figures

### Supplementary Figure 1. Flow cytometry and RT-qPCR analysis of germ cells and somatic cells.

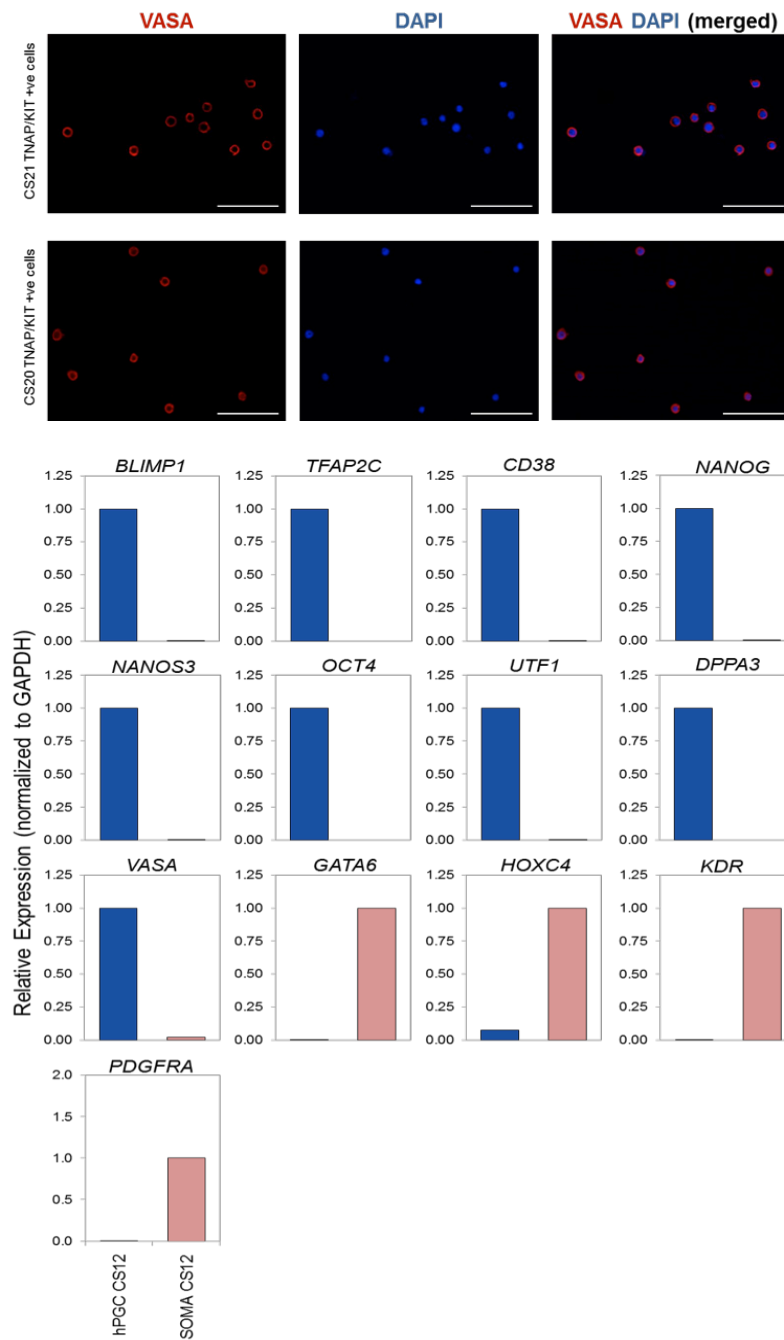

Supplementary Figure 2. RT-qPCR analysis for germ cell specific and soma transcripts.

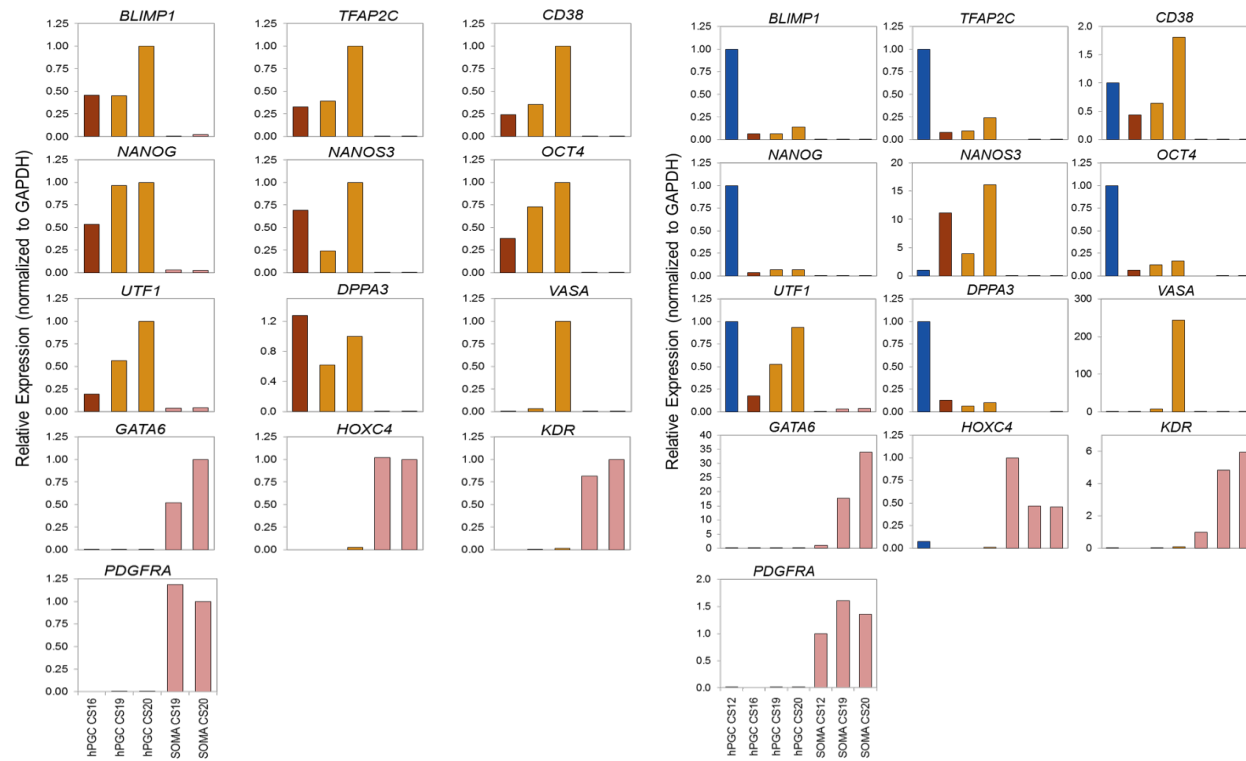

### Supplementary Figure 3. Ultra-deep sequencing quality.

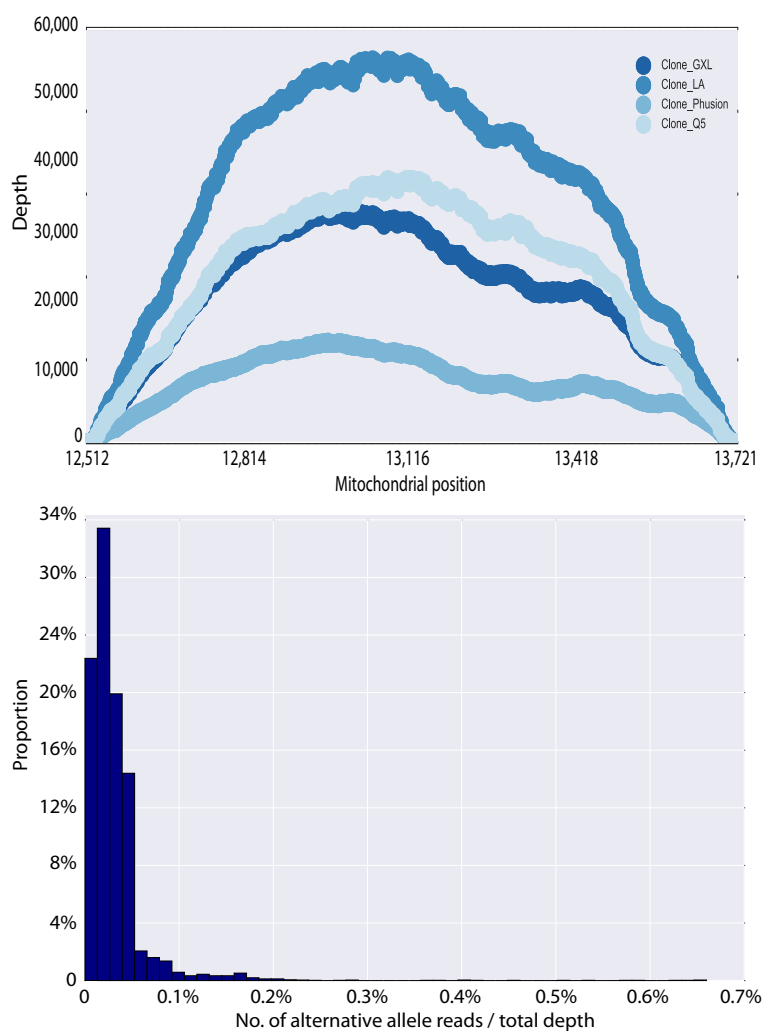

### Supplementary Figure 4. RNAseq of human primordial germ cells (PGCs).

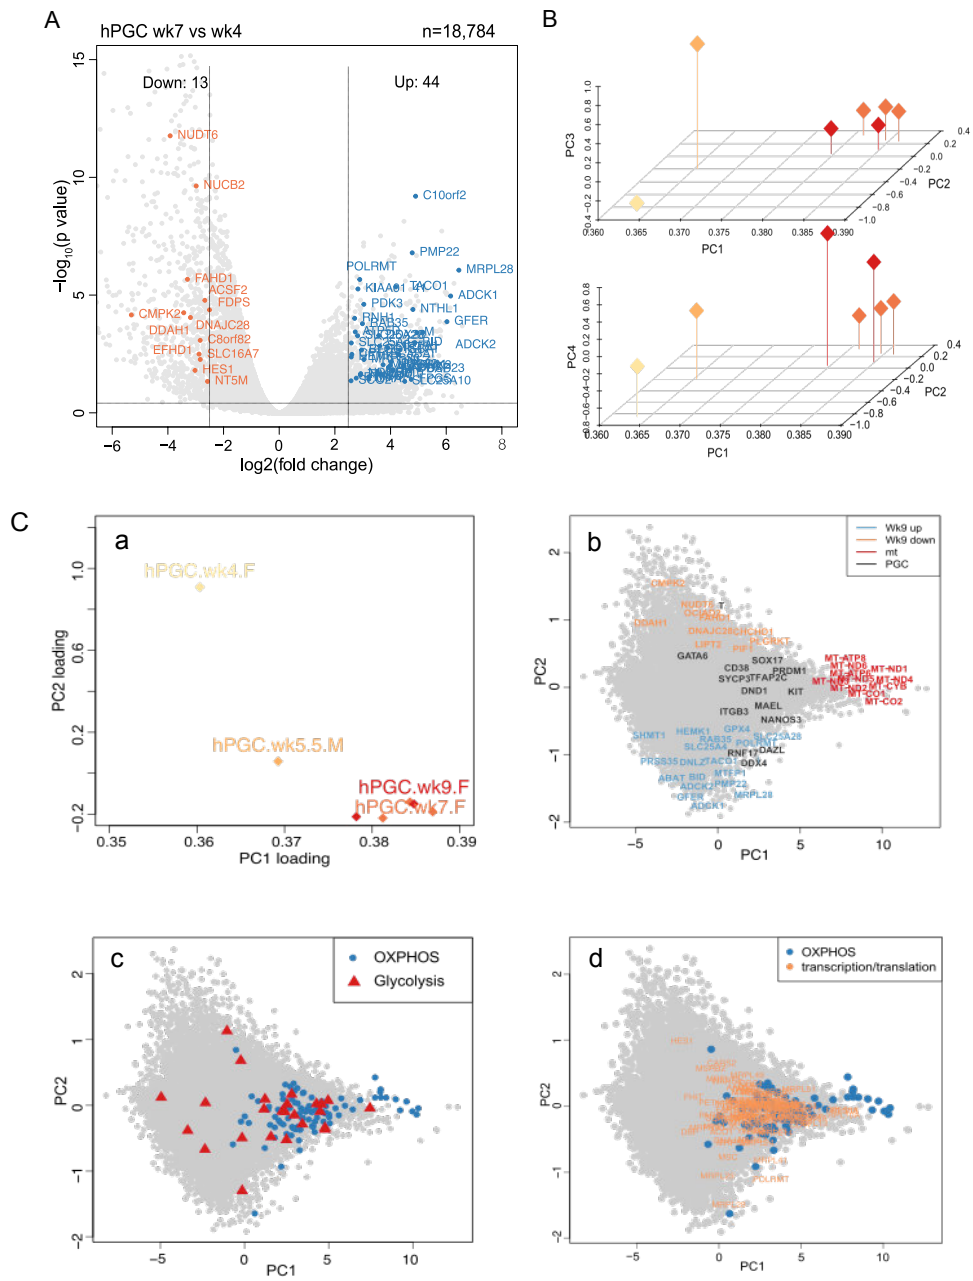

**Supplementary Figure 5. 2-D PCA of the respiratory electron transport chain complexes & gene expression correlation of hPGCs, soma and hESCs samples.**

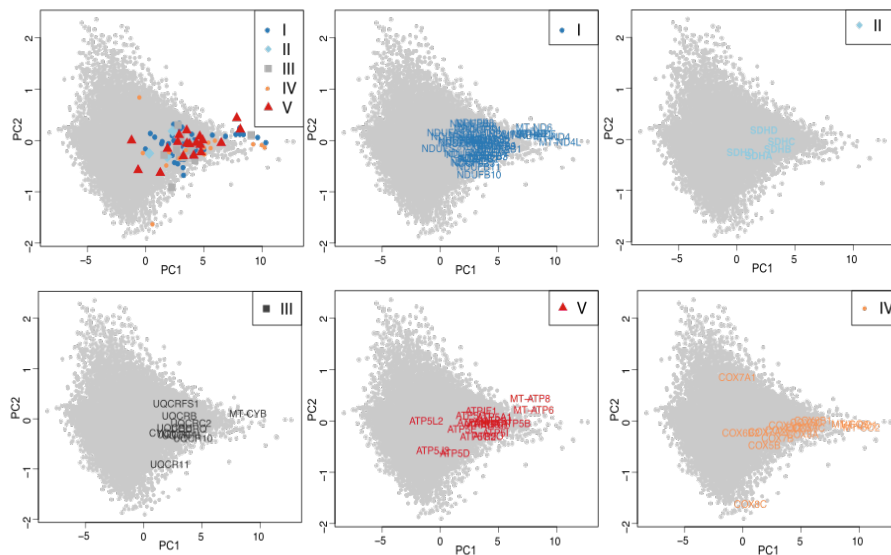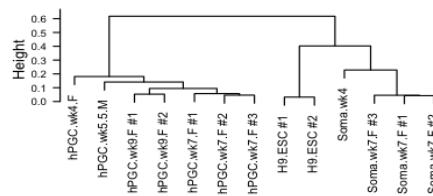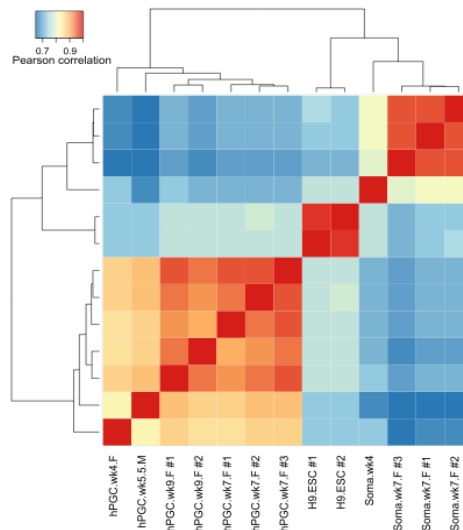

Supplement: EMS83069-supplement-Supplementary_figures.pdf [file EMS83069-supplement-Supplementary_figures.pdf]
